# Supplementary material
Source: PubMed Central journal article supplement (PMC5451346)
Supplement: 2016_162909-Disclosures_and_Contributions.pdf [file 2016_162909-Disclosures_and_Contributions.pdf]

Haematologica  
HAEMATOL/2016/162909  
Version 3

Mutational analysis in serial marrow samples during azacitidine treatment in patients with post-transplant relapse of acute myeloid leukemia or myelodysplastic syndromes

Janghee Woo, Nicholas P. Howard, Barry E. Storer, Min Fang, Cecilia C. Yeung, Bart L. Scott, and H. Joachim Deeg

Disclosures: None

Contributions: JW designed the experiments, oversaw the mutation analysis and wrote the manuscript NPH carried out most of the mutation experiments BLS together with JW carried out the statistical analysis MF and CCY provided cytogenetic back ground data and assisted in the interpretation of data BLS designed the clinical protocol on which patients were enrolled and obtained marrow samples for study. HJD co-designed the protocol and the analysis and together with JW wrote the manuscript.
